# Supplementary material for: 2-Selenouridine, a Modified Nucleoside of Bacterial tRNAs, Its Reactivity in the Presence of Oxidizing and Reducing Reagents
Source: MDPI journal article supplement (doi:10.3390/ijms23147973), 2022-07-19
Supplement: s1 [file s1]

## SUPPORTING INFORMATION

# 2-Selenouridine, a Modified Nucleoside of Bacterial tRNAs, Its Reactivity in the Presence of Oxidizing and Reducing Reagents

Katarzyna Kulik <sup>1,\*</sup>, Klaudia Sadowska <sup>2</sup>, Ewelina Wielgus <sup>1</sup>, Barbara Pacholczyk-Sienicka <sup>2</sup>, Elzbieta Sochacka <sup>2</sup> and Barbara Nawrot <sup>1</sup>

<sup>1</sup> Centre of Molecular and Macromolecular Studies, Polish Academy of Sciences, Sienkiewicza 112, 90-363 Lodz, Poland; ms@cbmm.lodz.pl (E.W.); bnawrot@cbmm.lodz.pl (B.N.)

<sup>2</sup> Institute of Organic Chemistry, Lodz University of Technology, Zeromskiego 116, 90-924 Lodz, Poland; klaudia.sadowska@dokt.p.lodz.pl (K.S.); barbara.pacholczyk@p.lodz.pl (B.P.-S.); elzbieta.sochacka@p.lodz.pl (E.S.)

\* Correspondence: kpieta@cbmm.lodz.pl; Tel.: +48-(42)-68-03-215

### Table of contents:

#### 1. Chemistry

- Synthesis of 2-selenouridine (Se2U, **1**)
- Synthesis of 2-selenouridine (Se2U, **1**) labelled <sup>77</sup>Se isotope selenium

#### 2. Spectral and mass spectrometry analysis of products

**Figure S1.** ESI(-)-HRMS analysis and UV spectrum of **1**

**Figure S2.** <sup>1</sup>H NMR (200 MHz, D<sub>2</sub>O) of **1**

**Figure S3.** ESI(-)-HRMS analysis of **1** labelled <sup>77</sup>Se isotope selenium

**Figure S4.** <sup>1</sup>H NMR (500 MHz, D<sub>2</sub>O) spectrum of **1** labelled <sup>77</sup>Se isotope selenium

**Figure S5.** ESI(-)-HRMS analysis and UV spectrum of **2**

**Figure S6.** ESI(-)-HRMS analysis of **4a**, n=1

**Figure S7.** ESI(-)-HRMS analysis and UV spectrum of **4b**, n=2

**Figure S8.** ESI(-)-HRMS analysis and UV spectrum of **5**

**Figure S9.** ESI(-)-HRMS analysis of and UV spectrum of **6**

**Figure S10.** ESI(-)-HRMS analysis and UV spectrum of **7**

**Figure S11.** ESI(-)-HRMS analysis of and UV spectrum of **8**

**Figure S12.** ESI(-)-HRMS analysis of **11**

**Figure S13.** ESI(-)-HRMS analysis of **12**

**Figure S14.** (A) ESI(-)-HRMS analysis of **13**; (B) ESI(-) MS of **13** with peaks correspond the double charged ions

**Figure S15.** (A) ESI(-)-HRMS analysis of **14**; (B) ESI(-) MS of **14** with peaks correspond the double charged ions

**Figure S16.** ESI(-)-MS of **15** with peaks correspond the double charged ions

**Figure S17.** ESI(-)-HRMS analysis of **16**

**Figure S18.** ESI(-)-HRMS analysis of **17**

**Figure S19.** ESI(-)-HRMS analysis of **18**

**Figure S20.** ESI(-)-HRMS analysis of **19**

**Figure S21.** ESI(-)-HRMS analysis of **20**

**Figure S22.** ESI(-)-MS of **21** with peaks correspond the double charged ions

**Figure S23.** ESI(-)-HRMS analysis and UV spectrum of **22**

**Figure S24.** EI (electron impact) mass spectrum of product released as red precipitate

**Figure S25.**  $^1\text{H}$  NMR (700 MHz,  $\text{D}_2\text{O}$ ) spectrum of dinucleoside **6**

**Figure S26.**  $^1\text{H}$ - $^1\text{H}$  COSY (700 MHz,  $\text{D}_2\text{O}$ ) of **6**

**Figure S27.**  $^1\text{H}$ - $^{13}\text{C}$  HSQC (700 MHz,  $\text{D}_2\text{O}$ ) of **6**

**Figure S28.**  $^1\text{H}$ - $^{13}\text{C}$  HMBC (700 MHz,  $\text{D}_2\text{O}$ ) of **6**

**Table S1.** UPLC-PDA-ESI (-)-HRMS products identified during rescue assay

### 3. Time course of the oxidation of Se2U (**1**) by hydrogen peroxide monitored by NMR spectroscopy and LCMS

**Figure S29.**  $^1\text{H}$  NMR analysis of the reaction mixtures for oxidation of Se2U (**1**, 10 mM) with  $\text{H}_2\text{O}_2$  (100 mM) in 67 mM phosphate buffer pH 7.4, at room temperature.

**Figure S30.** UPLC-PDA chromatographic analysis of the reaction mixtures for oxidation of Se2U (**1**, 10 mM) with  $\text{H}_2\text{O}_2$  (100 mM) in 67 mM phosphate buffer pH 7.4, at room temperature.

**Figure S31.**  $^1\text{H}$  NMR analysis of the reaction mixtures for oxidation of Se2U (**1**, 10 mM) with  $\text{H}_2\text{O}_2$  (10 mM) in 67 mM phosphate buffer pH 8.0, at room temperature.

**Figure S32.**  $^1\text{H}$  NMR analysis of the reaction mixtures for oxidation of Se2U (**1**, 10 mM) with  $\text{H}_2\text{O}_2$  (10 mM) in 67 mM phosphate buffer pH 5.0, at room temperature.

**Figure S33.**  $^1\text{H}$  NMR analysis of the reaction mixtures for oxidation of Se2U (**1**, 10 mM) with  $\text{H}_2\text{O}_2$  (10 mM) in water, at room temperature

**Figure S34.**  $^1\text{H}$  NMR analysis of the reaction mixtures for oxidation of Se2U (**1**, 10 mM) with  $\text{H}_2\text{O}_2$  (100 mM) in water, at room temperature

**Figure S35.** UPLC-PDA chromatographic analysis of the reaction mixtures for oxidation of Se2U (**1**, 10 mM) with  $\text{H}_2\text{O}_2$  (10 mM) in deionized water, at room temperature

**Figure S36.** UPLC-PDA chromatographic analysis of the reaction mixtures for oxidation of Se2U (**1**, 10 mM) with  $\text{H}_2\text{O}_2$  (100 mM) in deionized water, at room temperature

**Figure S37.**  $^1\text{H}$  NMR analysis of the reaction mixtures for oxidation of Se2U (**1**, 10 mM) with  $\text{H}_2\text{O}_2$  (5 mM) in 67 mM phosphate buffer pH 7.4, at 10 °C

**Figure S38.**  $^1\text{H}$  NMR analysis of the reaction mixtures for oxidation of Se2U (**1**, 10 mM) with  $\text{H}_2\text{O}_2$  (10 mM) in 67 mM phosphate buffer pH 7.4, at 10 °C

**Figure S39**  $^1\text{H}$  NMR analysis of the reaction mixtures for the oxidation of Se2U (**1**, 40 mM) with  $\text{H}_2\text{O}_2$  (20 mM) in phosphate buffer pH 7.4 at 10 °C.

#### 1a. Synthesis of 2-selenouridine (Se2U, **1**)

2-Selenouridine (**1**) was obtained according to the previously described procedure [1].  $^1\text{H}$  NMR (500 MHz,  $\text{D}_2\text{O}$ )  $\delta$  8.04 (dd,  $J$  = 8.2, 1H), 6.58 (s, 1H), 6.16 (d,  $J$  = 8.0 Hz, 1H), 4.30 (s, 1H), 4.07 (s, 2H), 3.88 (dd,  $J$  = 12.4, 1H), 3.73 (dd,  $J$  = 12.4, 1H). HRMS (ESI); calcd. for  $\text{C}_9\text{H}_{11}\text{N}_2\text{O}_5\text{Se}$   $[\text{M}-\text{H}]^-$  306.9833, found 306.9834. Spectral data are given Figures S1 and S2.

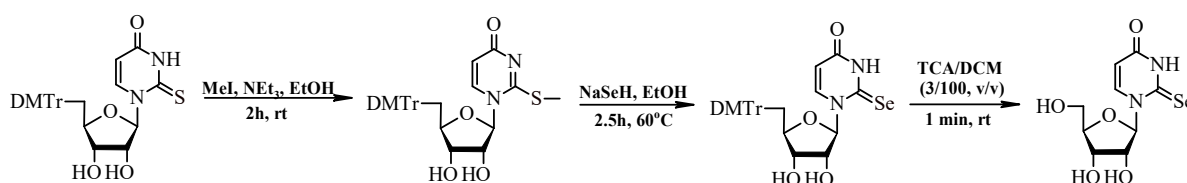

## 1b. Synthesis of 2-selenouridine (Se2U, **1**) labelled $^{77}\text{Se}$ isotope selenium

2-Selenouridine (**1**) was obtained as mentioned above with using the NMR-active  $^{77}\text{Se}$  isotope of selenium to generate the sodium hydroselenide ( $\text{NaHSe}$ ).  $^1\text{H}$  NMR (500 MHz,  $\text{D}_2\text{O}$ )  $\delta$  8.01 (d,  $J = 8.4$ , 1H), 6.55 (m, 1H), 6.13 (d,  $J = 8.0$  Hz, 1H), 4.22 (q,  $J = 2.6$  Hz, 1H), 4.04 (d,  $J = 2.5$  Hz, 2H), 3.85 (dd,  $J = 13.1$ , 1.6 Hz, 1H), 3.70 (dd,  $J = 13.1$ , 2.5 Hz, 1H).  $^{77}\text{Se}$  NMR (95 MHz,  $\text{D}_2\text{O}$ )  $\delta$  353.79. HRMS (ESI); calcd. for  $\text{C}_9\text{H}_{11}\text{N}_2\text{O}_5^{77}\text{Se}$   $[\text{M}-\text{H}]^-$  303.9867, found 303.9866. Spectral data are given Figures S3 and S4.

## 2. Spectral and mass spectrometry analysis of products

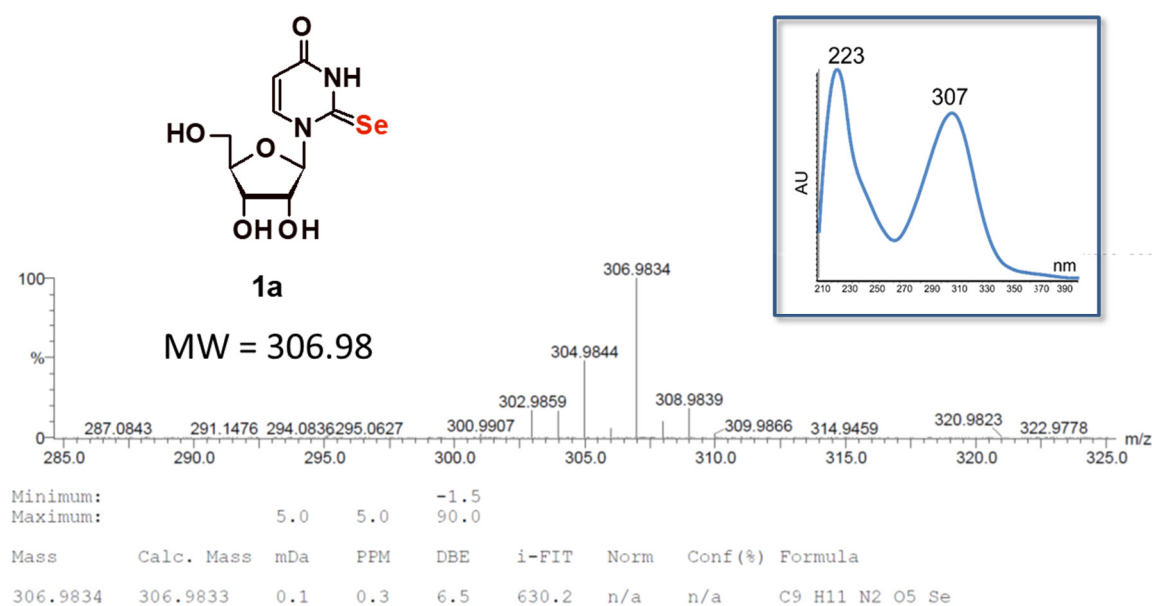

**Figure S1.** ESI(-)-HRMS analysis and UV spectrum of **1**.

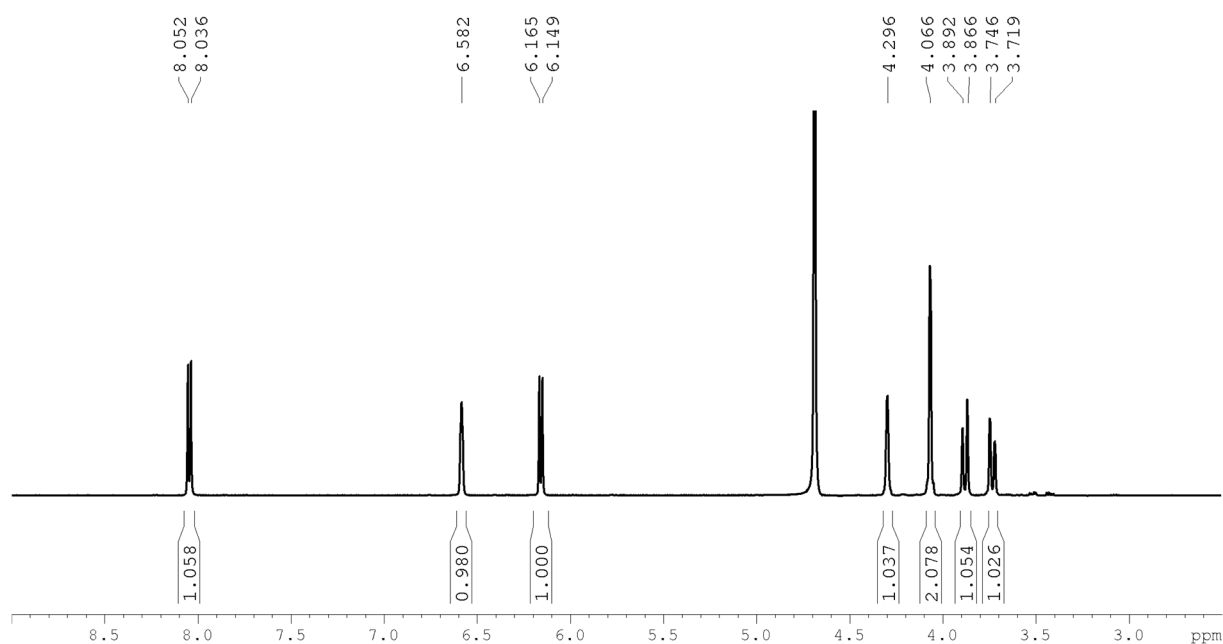

**Figure S2.** <sup>1</sup>H NMR (500 MHz, D<sub>2</sub>O) of 1.

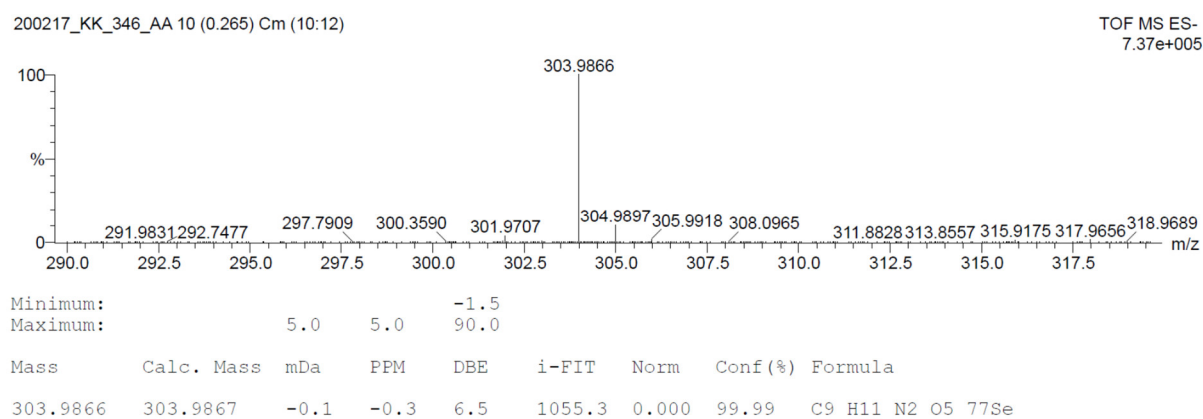

**Figure S3.** ESI(-)-HRMS analysis of 1 labelled <sup>77</sup>Se isotope selenium.

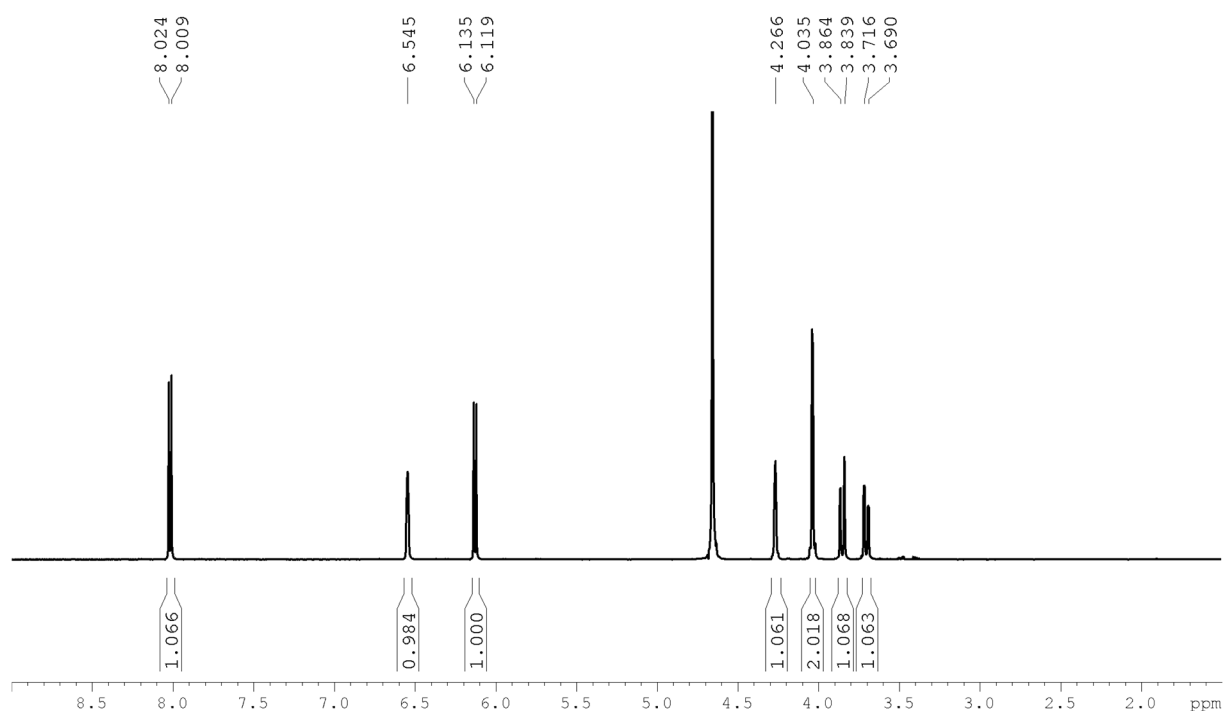

**Figure S4.**  $^1\text{H}$  NMR (500 MHz,  $\text{D}_2\text{O}$ ) spectrum of **1** labelled  $^{77}\text{Se}$  isotope selenium.

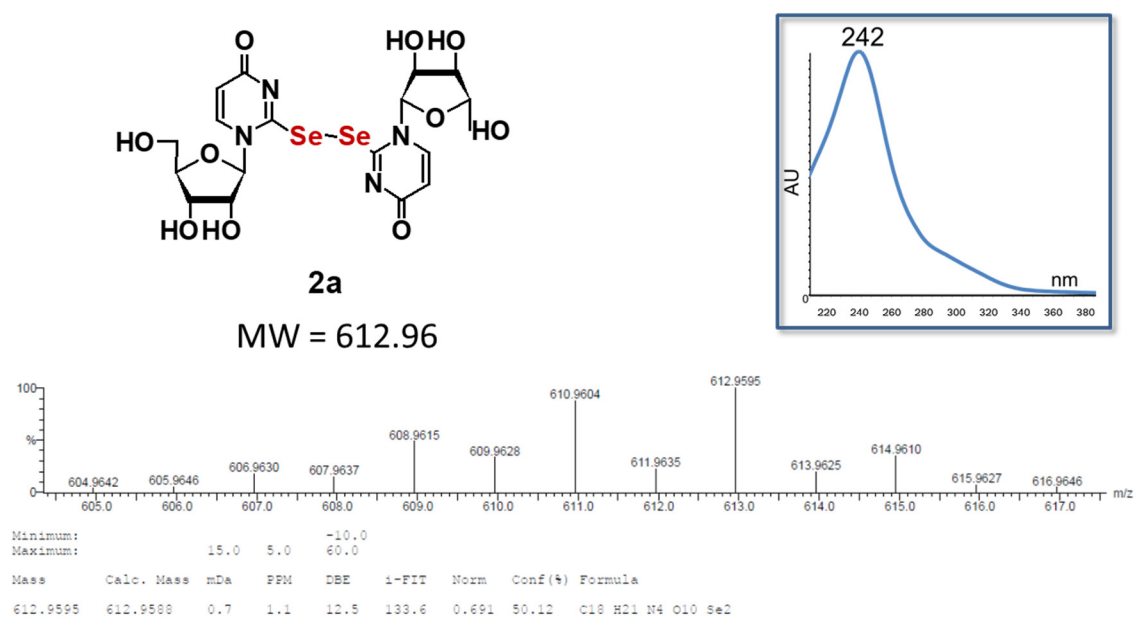

**Figure S5.** ESI(-)-HRMS analysis and UV spectrum of **2**.

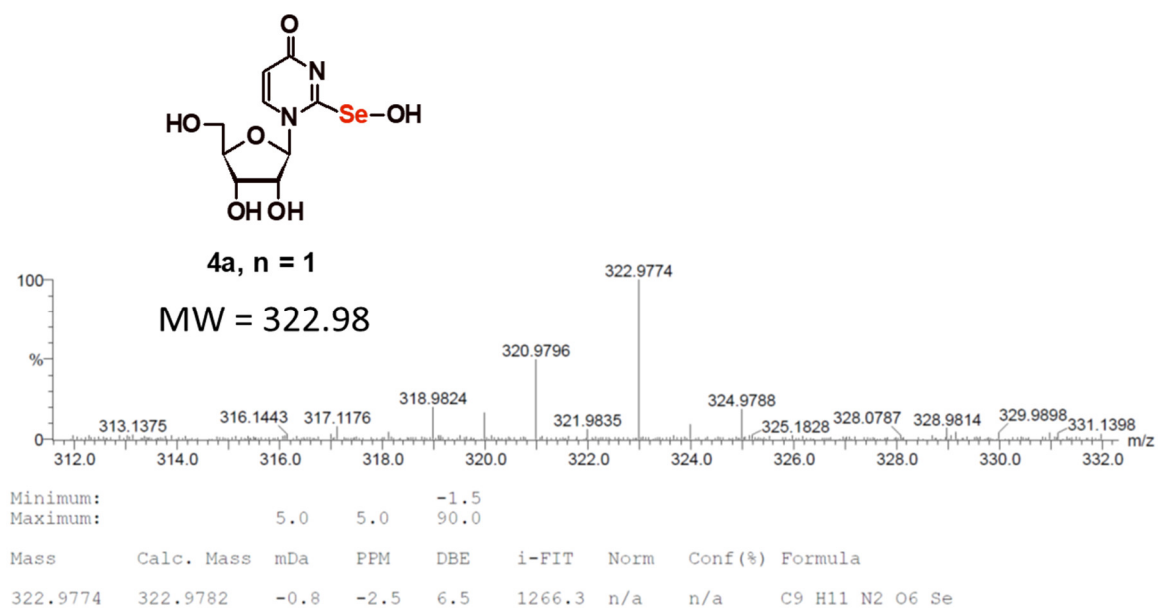

**Figure S6.** ESI(-)-HRMS analysis of **4a**, n=1.

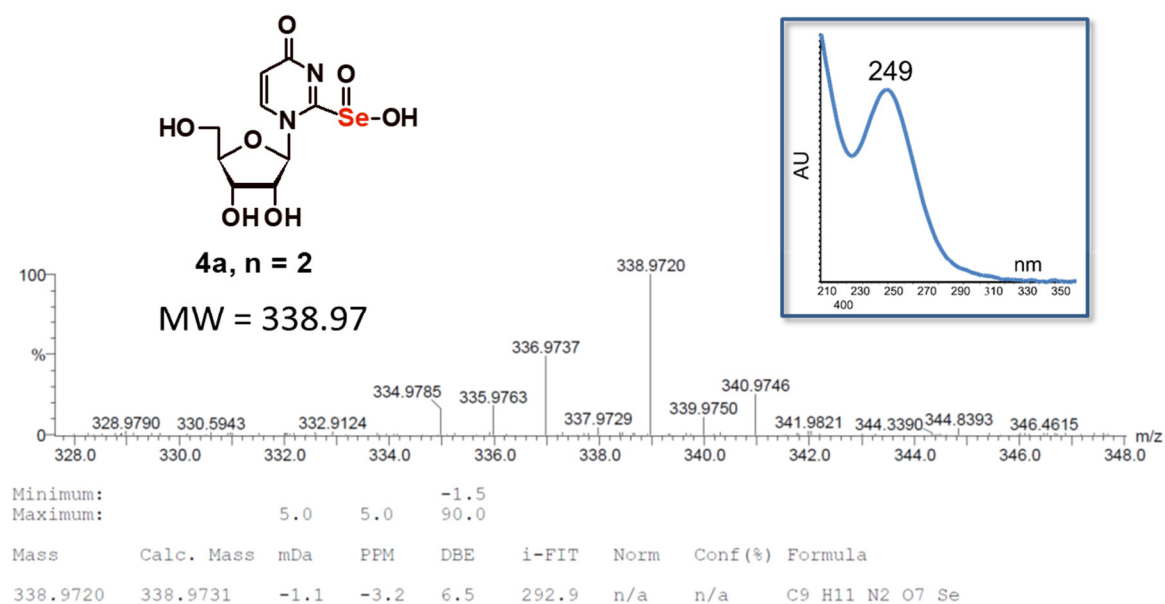

**Figure S7.** ESI(-)-HRMS analysis and UV spectrum of **4b**, n=2.

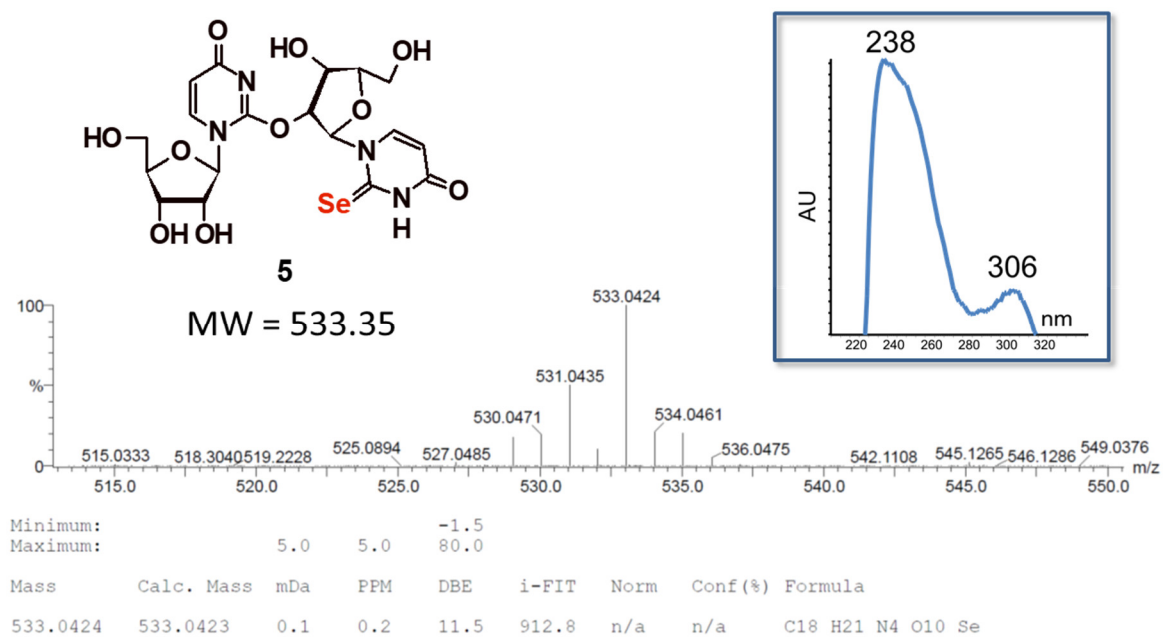

**Figure S8.** ESI(-)-HRMS analysis and UV spectrum of **5**.

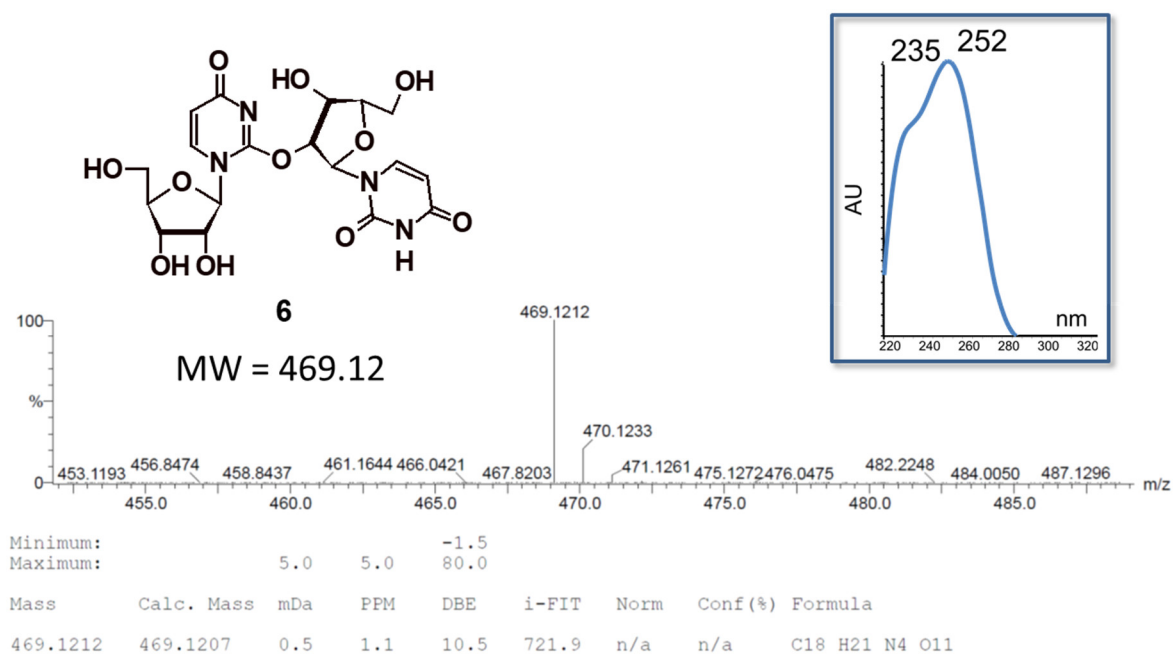

**Figure S9.** ESI(-)-HRMS analysis of and UV spectrum of **6**.

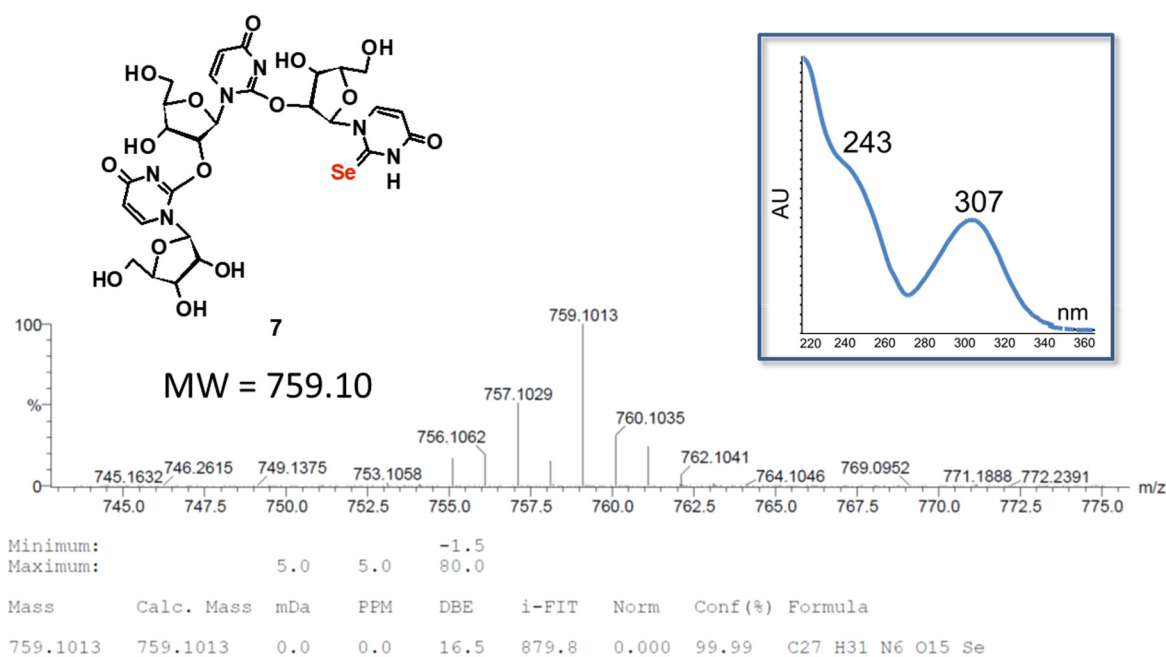

**Figure S10.** ESI(-)-HRMS analysis and UV spectrum of **7**.

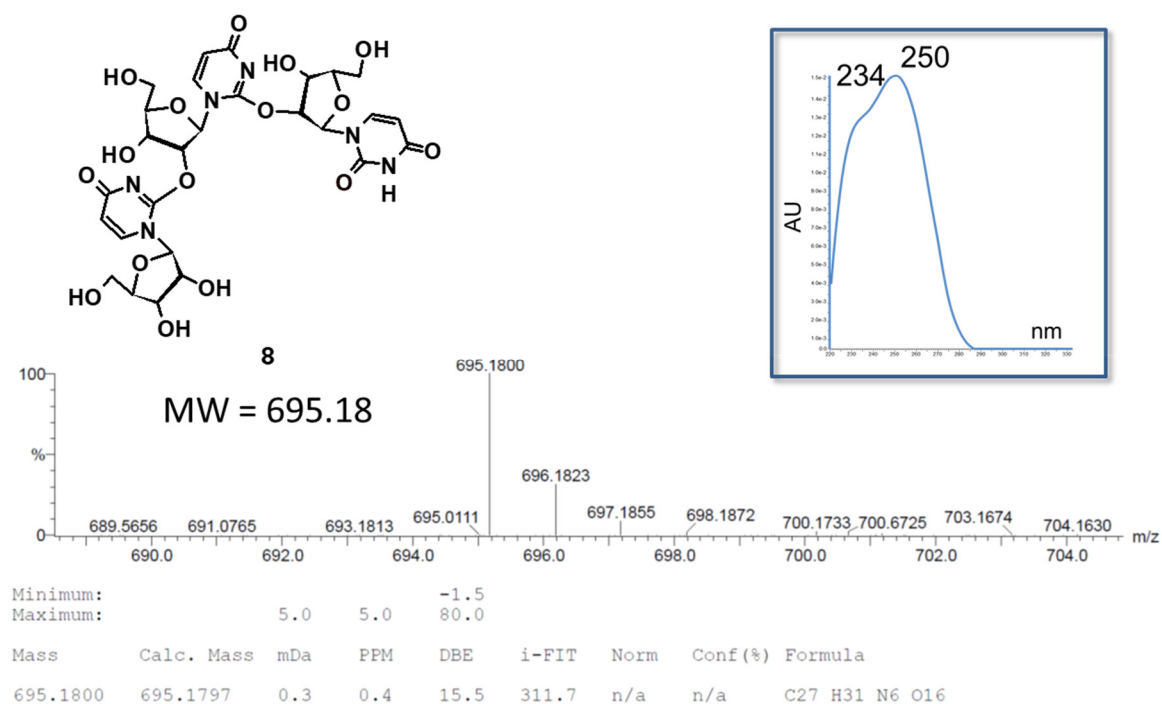

**Figure S11.** ESI(-)-HRMS analysis and UV spectrum of **8**.



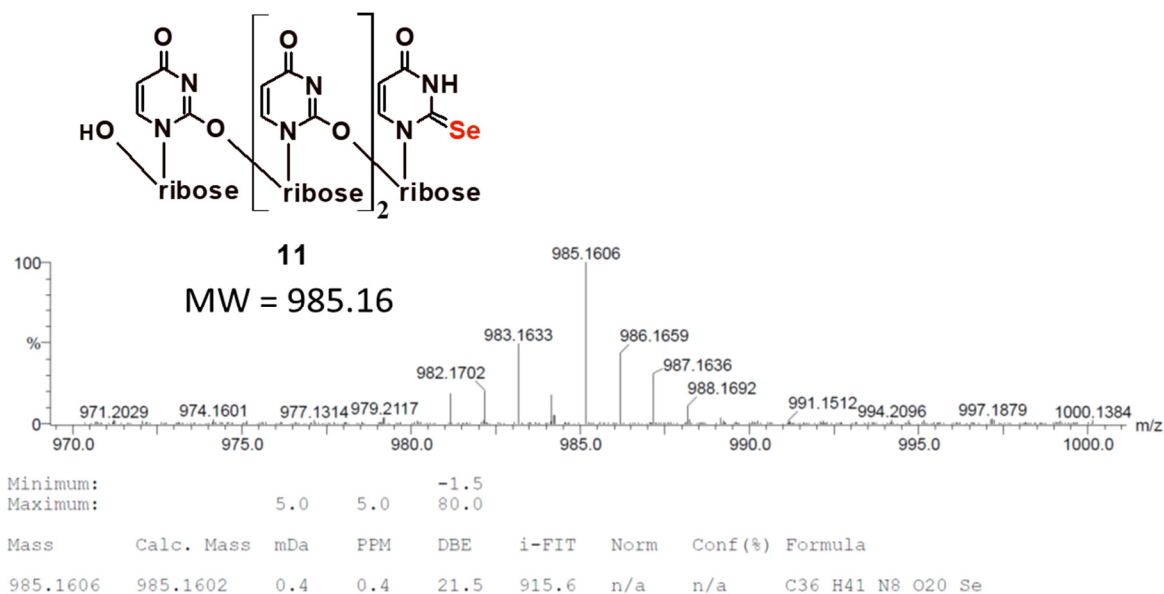

**Figure S12.** ESI(-)-HRMS analysis of **11**.

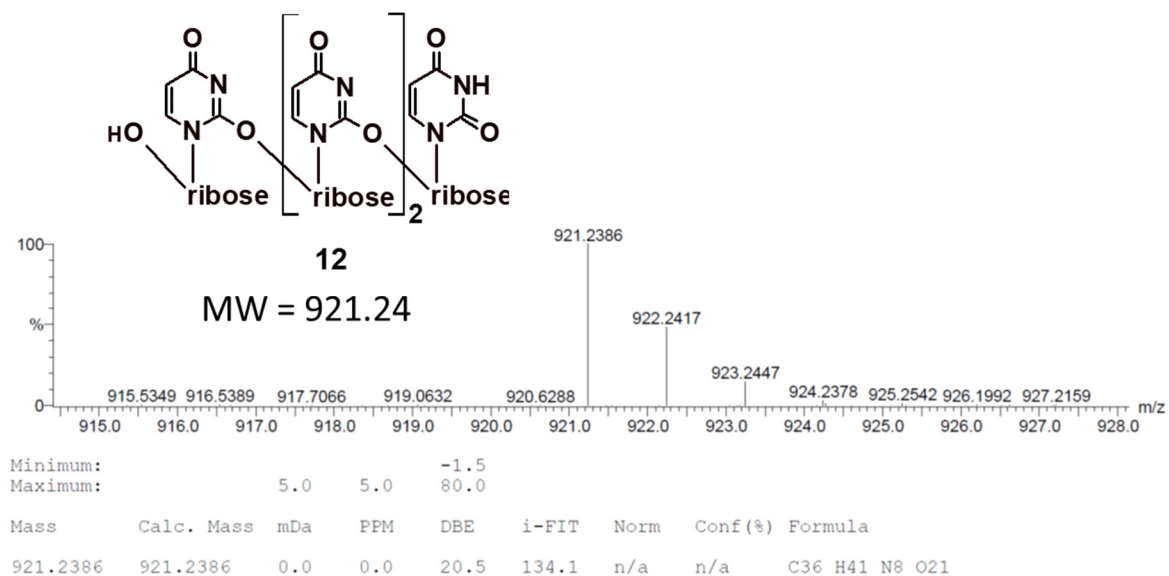

**Figure S13.** ESI(-)-HRMS analysis of **12**.

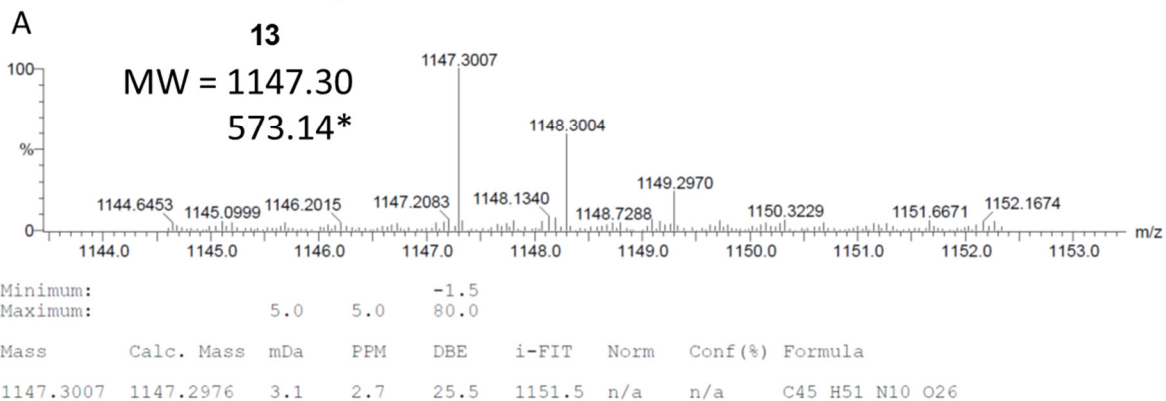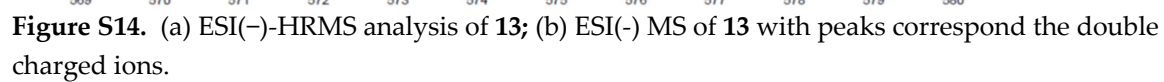

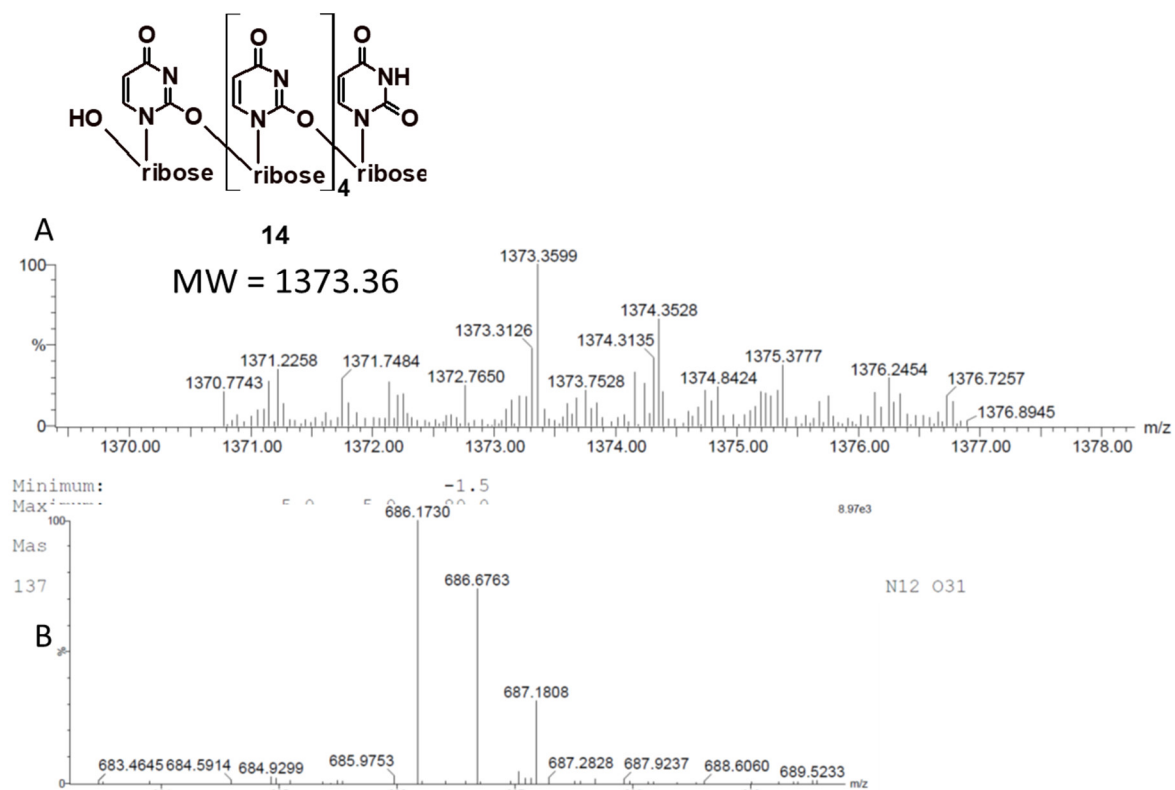

**Figure S15.** (a) ESI(-)-HRMS analysis of **14**; (b) ESI(-) MS of **14** with peaks correspond the double charged ions.

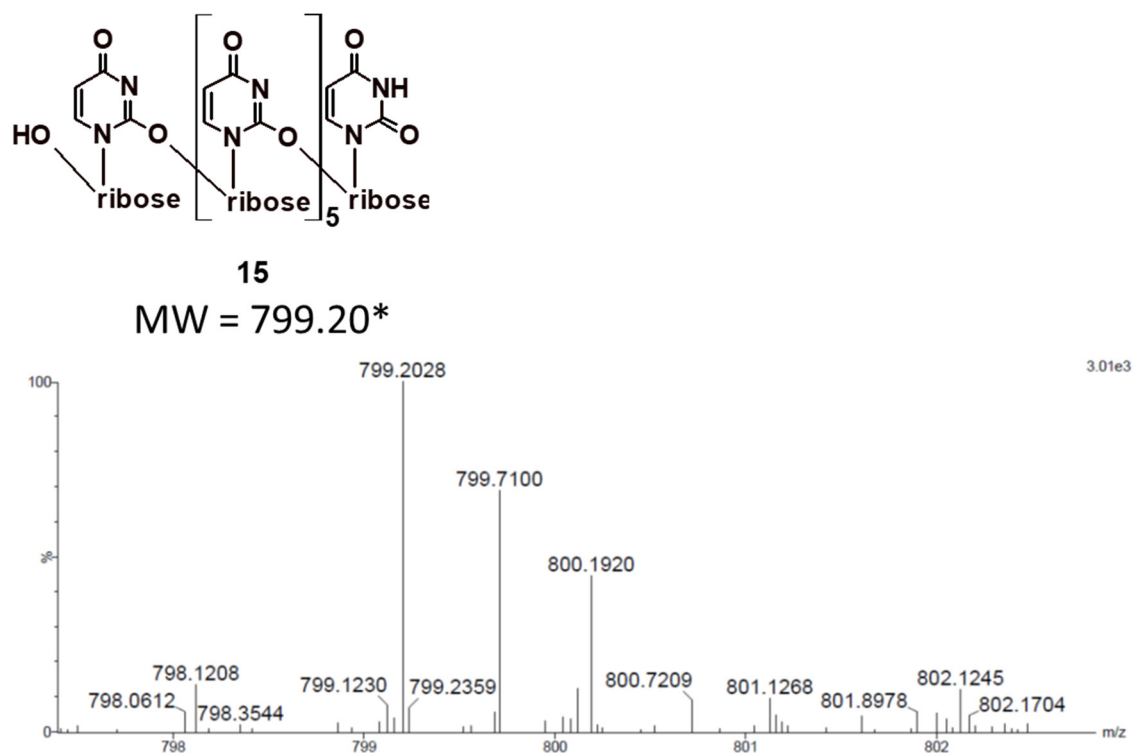

**Figure S16.** ESI(-)-MS of **15** with peaks correspond the double charged ions.

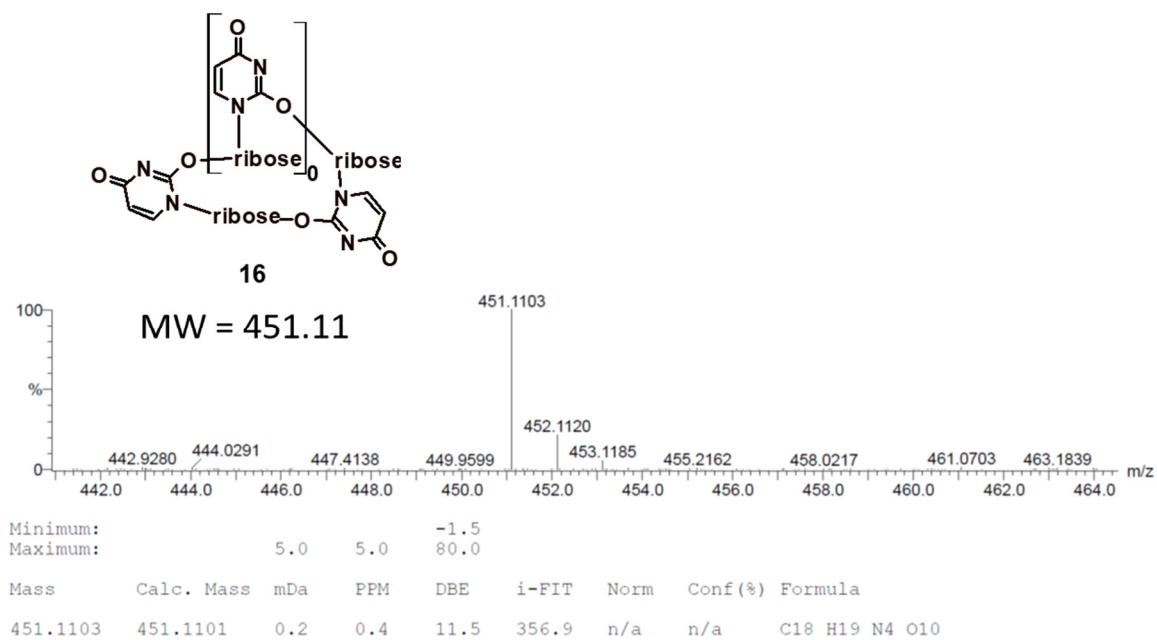

**Figure S17.** ESI(-)-HRMS analysis of **16**.

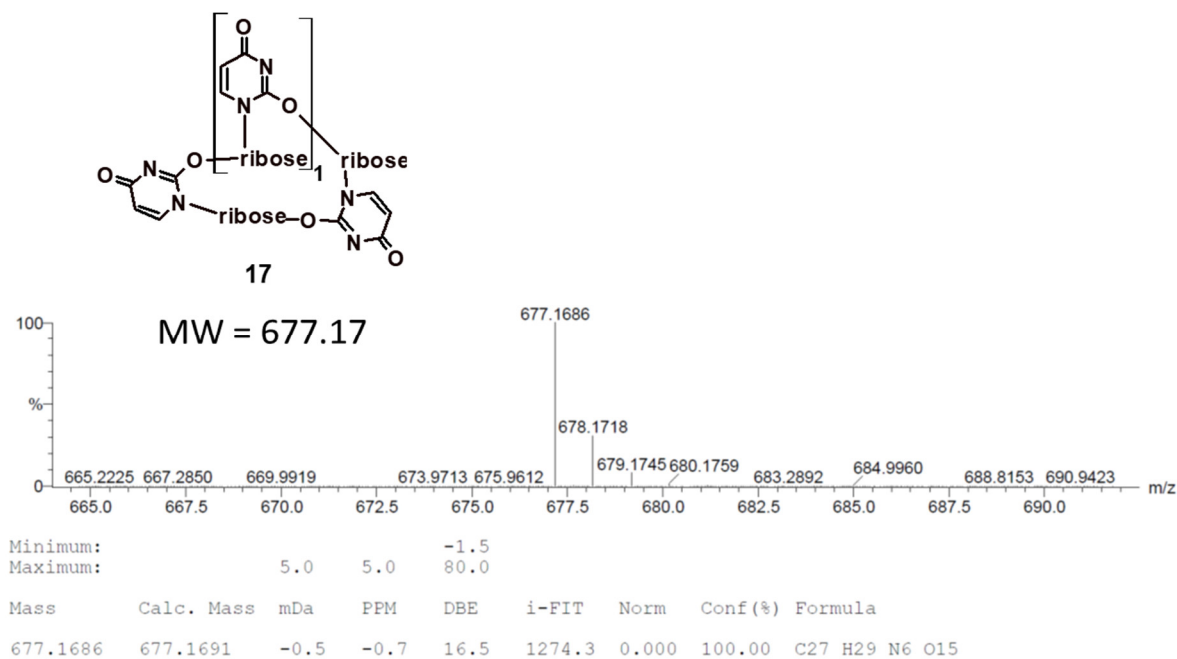

**Figure S18.** ESI(-)-HRMS analysis of **17**.

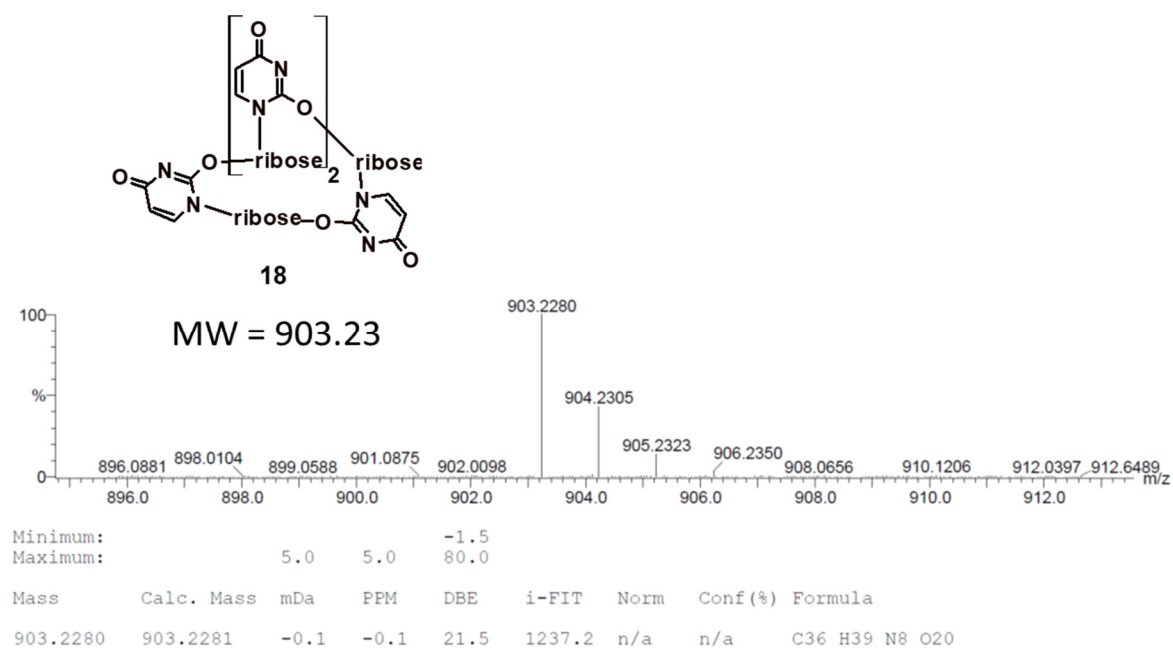

**Figure S19.** ESI(-)-HRMS analysis of **18**.

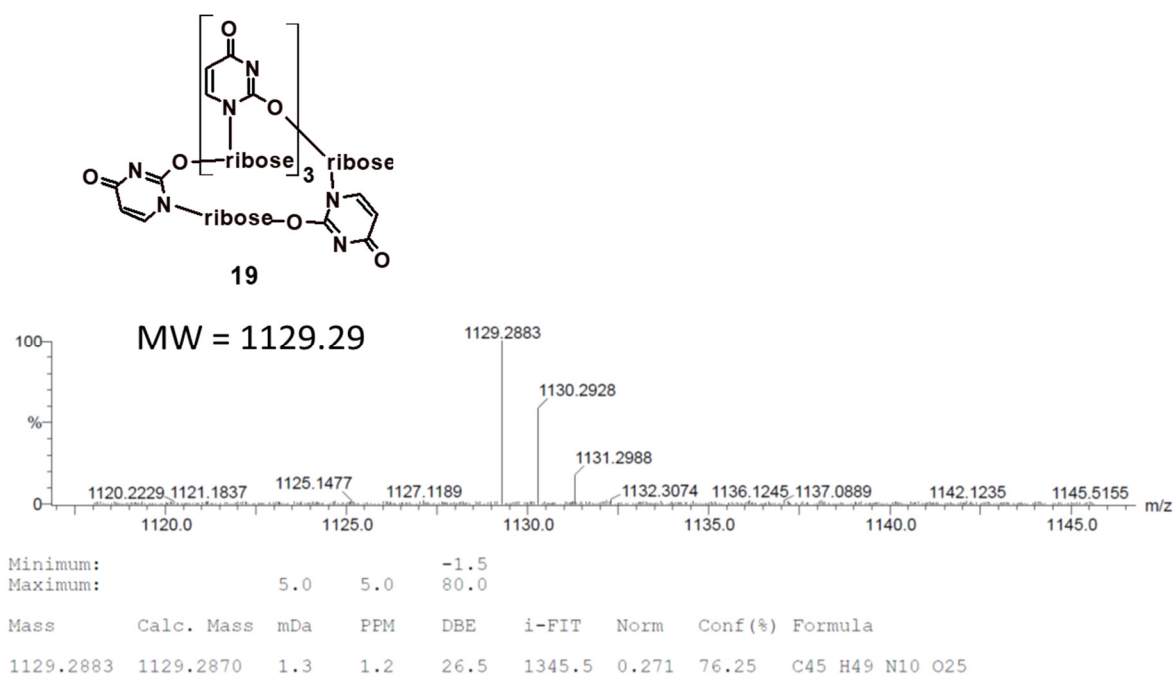

**Figure S20.** ESI(-)-HRMS analysis of **19**.

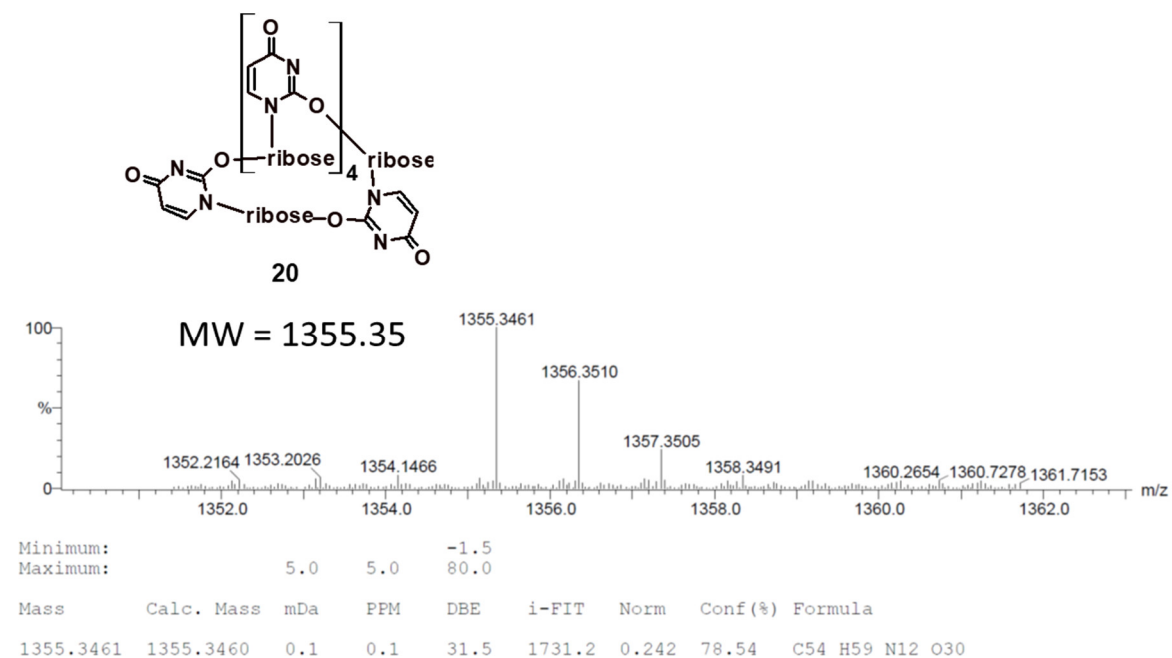

**Figure S21.** ESI(-)-HRMS analysis of **20**.

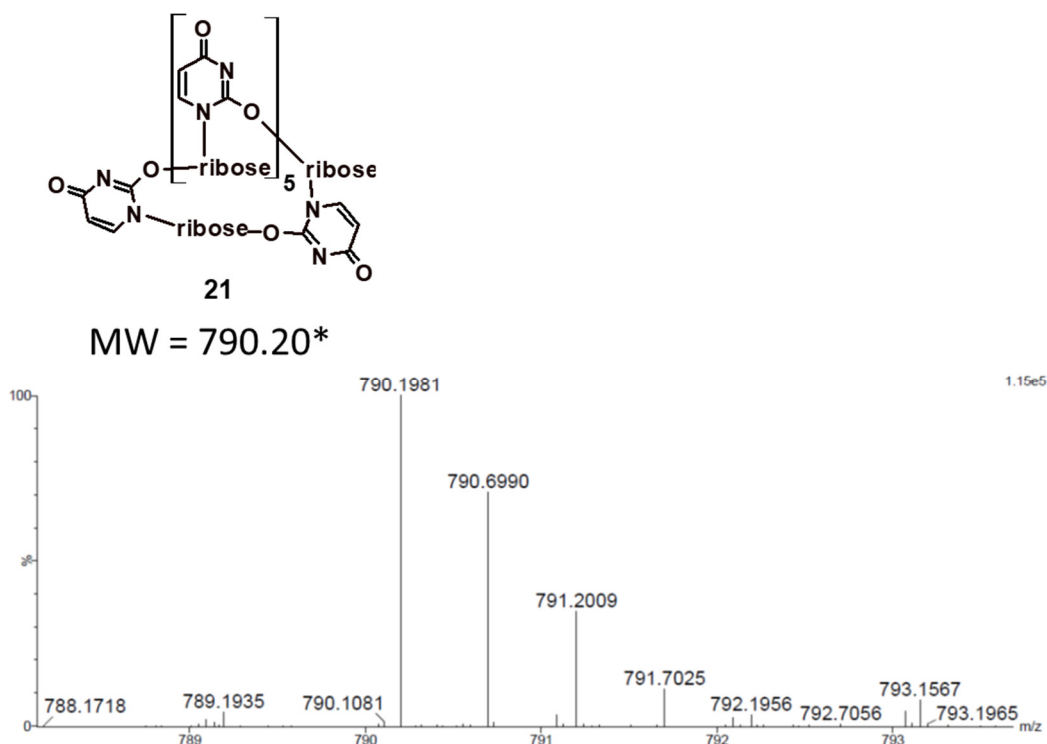

**Figure S22.** ESI(-)-MS of **21** with peaks correspond the double charged ions.

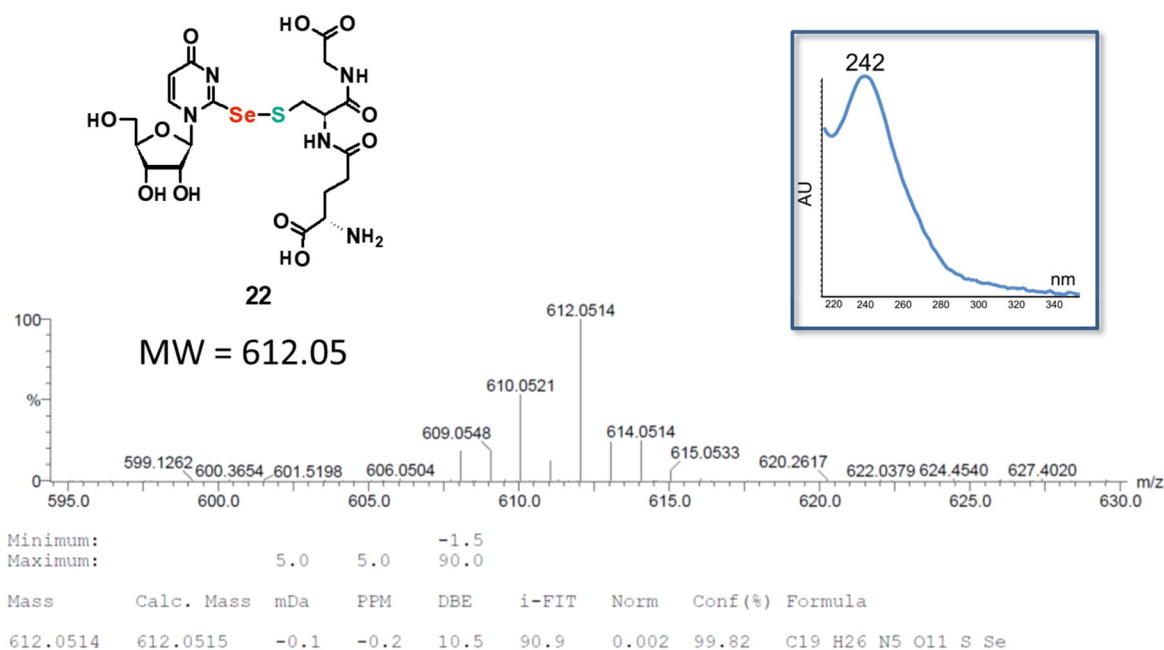

**Figure S23.** ESI(-)-HRMS analysis and UV spectrum of **22**.

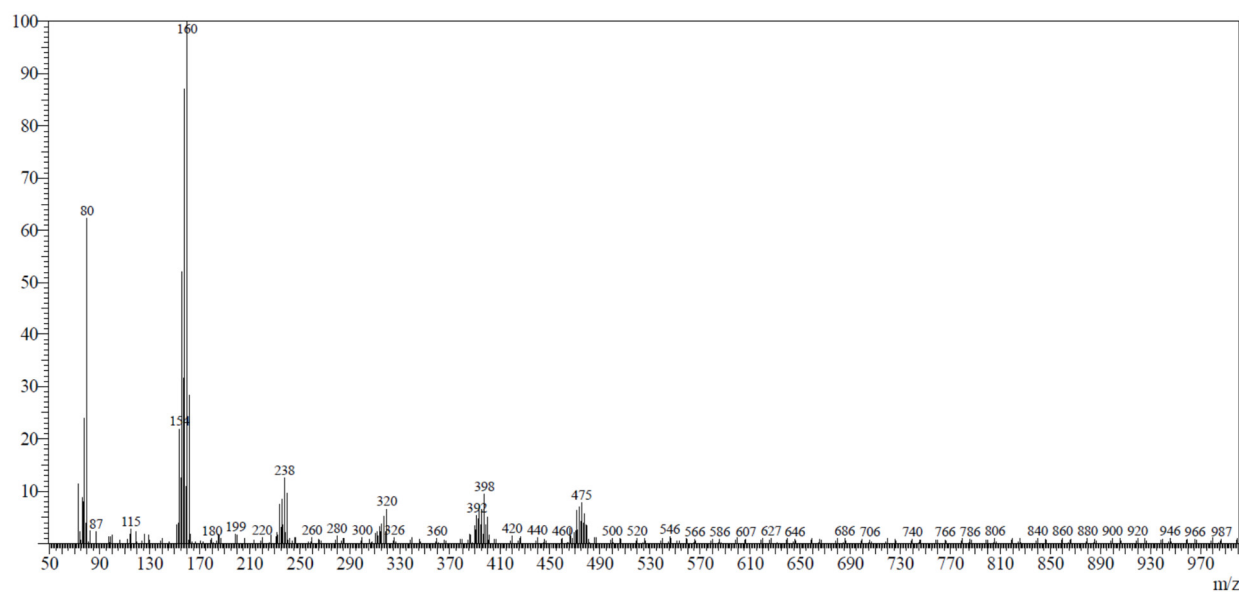

**Figure S24.** EI (electron impact) mass spectrum of product released as red precipitate.

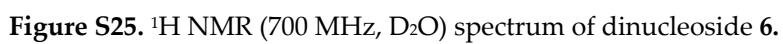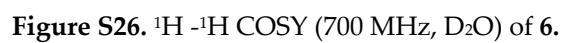



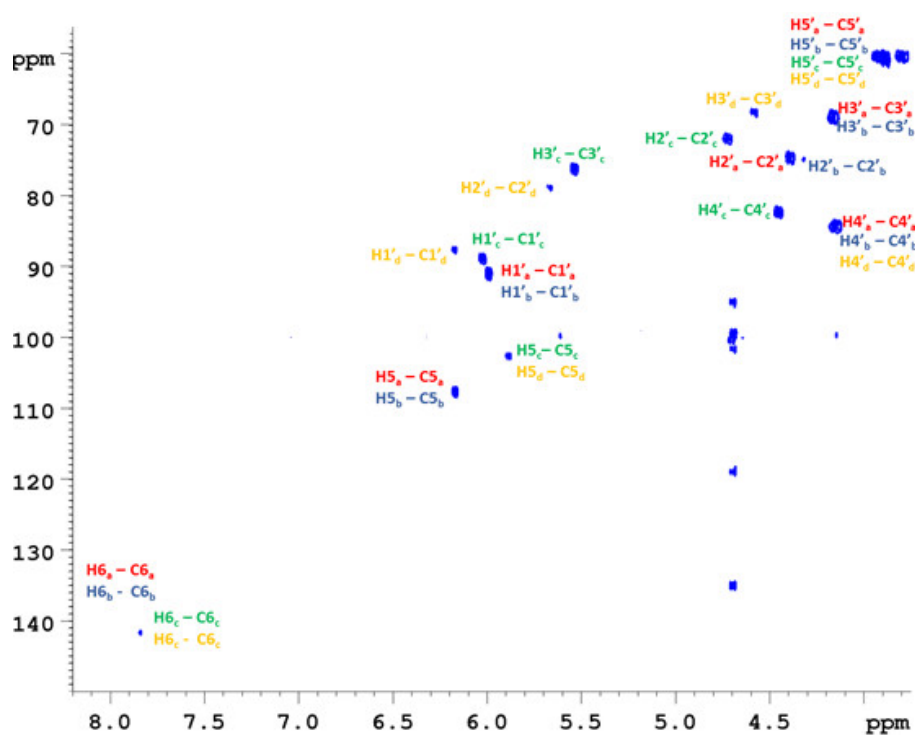

Figure S27.  $^1\text{H}$ - $^{13}\text{C}$  HSQC (700 MHz,  $\text{D}_2\text{O}$ ) of 6.

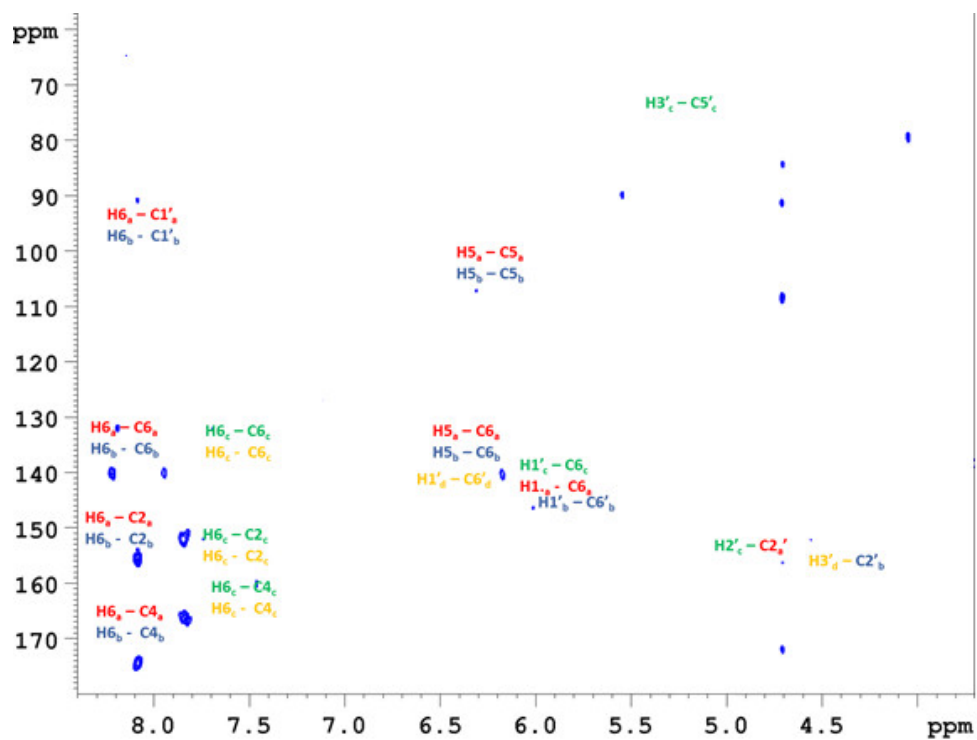

Figure S28.  $^1\text{H}$ - $^{13}\text{C}$  HMBC (700 MHz,  $\text{D}_2\text{O}$ ) of 6. Only the main cross peaks are marked in the spectrum.

**Table S1.** UPLC-PDA-ESI (-)-HRMS products identified during rescue assay. The UPLC retention time (Rt, min) and *m/z* data (atomic mass unit to its formal charge ratio) for [M-H]<sup>-</sup> in negative mode are given.

| Compound          | UPLC-PDA-ESI(-)-HRMS                                                          |          |                               |          |
|-------------------|-------------------------------------------------------------------------------|----------|-------------------------------|----------|
|                   | Elemental Composition                                                         | Rt [min] | <i>m/z</i> [M-H] <sup>-</sup> |          |
|                   |                                                                               |          | Calcd                         | Found    |
| DTT               | C <sub>4</sub> H <sub>10</sub> O <sub>2</sub> S <sub>2</sub>                  | 3.74     | 153.0044                      | 153.0048 |
| DTT <sub>ox</sub> | C <sub>4</sub> H <sub>8</sub> O <sub>2</sub> S <sub>2</sub>                   | 4.01     | 150.9887                      | 150.9890 |
| Asc               | C <sub>6</sub> H <sub>8</sub> O <sub>6</sub>                                  | 1.09     | 175.0243                      | 175.0240 |
| Ascox             | C <sub>6</sub> H <sub>6</sub> O <sub>6</sub>                                  | 1.35     | 173.0860                      | 173.0090 |
| GSH               | C <sub>10</sub> H <sub>17</sub> N <sub>3</sub> O <sub>6</sub> S               | 1.15     | 306.0760                      | 306.0764 |
| GS-SG             | C <sub>20</sub> H <sub>32</sub> N <sub>6</sub> O <sub>12</sub> S <sub>2</sub> | 0.97     | 611.1142                      | 611.1440 |
| GS-Se2U           | C <sub>19</sub> H <sub>26</sub> N <sub>5</sub> O <sub>11</sub> SSe            | 2.33     | 612.0514                      | 612.0514 |

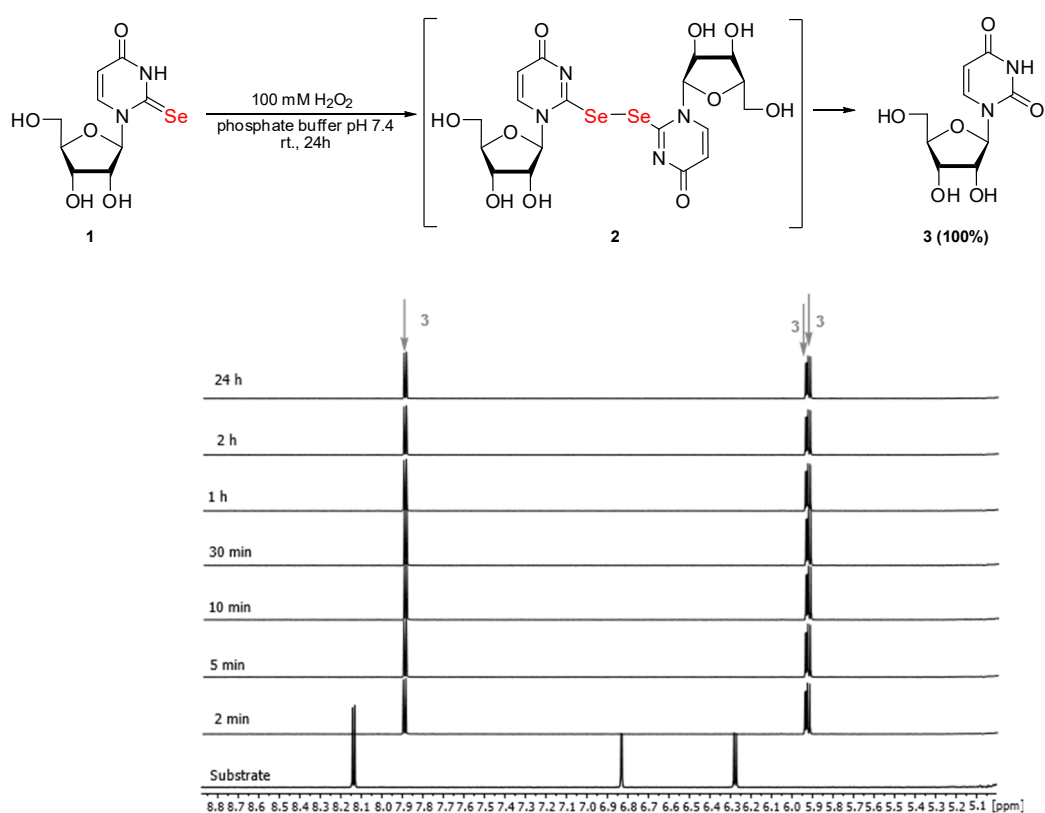

**Figure S29.** <sup>1</sup>H NMR analysis of the reaction mixtures for oxidation of Se2U (1, 10 mM) with H<sub>2</sub>O<sub>2</sub> (100 mM) in 67 mM phosphate buffer pH 7.4, at room temperature.

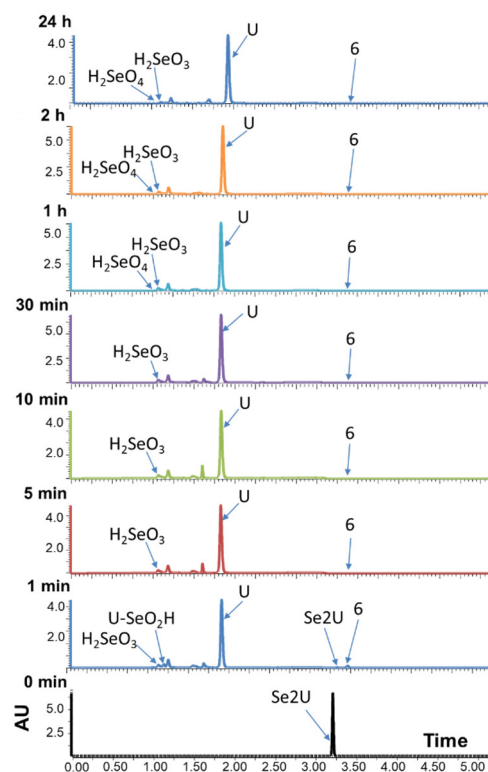

**Figure S30.** UPLC-PDA chromatographic analysis of the reaction mixtures for oxidation of Se2U (**1**, 10 mM) with H<sub>2</sub>O<sub>2</sub> (100 mM) in 67 mM phosphate buffer pH 7.4, at room temperature. Inorganic selenic acids were identified by UPLC-ESI(-)-HRMS and their retention times were determined based on extracted ion chromatograms (EICs) for the ions corresponding to their deprotonated molecules (*m/z* 128.909 and 144.904, respectively).

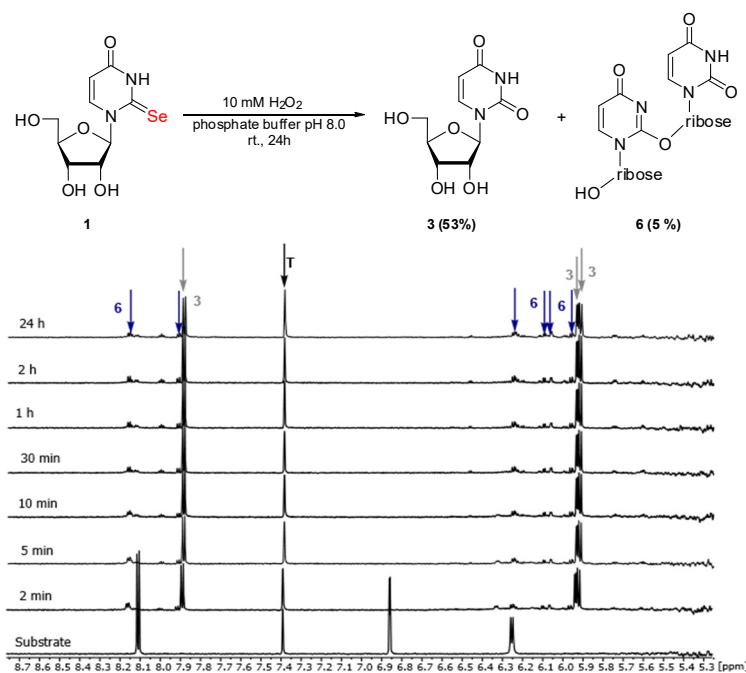

**Figure S31.** <sup>1</sup>H NMR analysis of the reaction mixtures for oxidation of Se2U (**1**, 10 mM) with H<sub>2</sub>O<sub>2</sub> (10 mM) in 67 mM phosphate buffer pH 8.0, at room temperature.

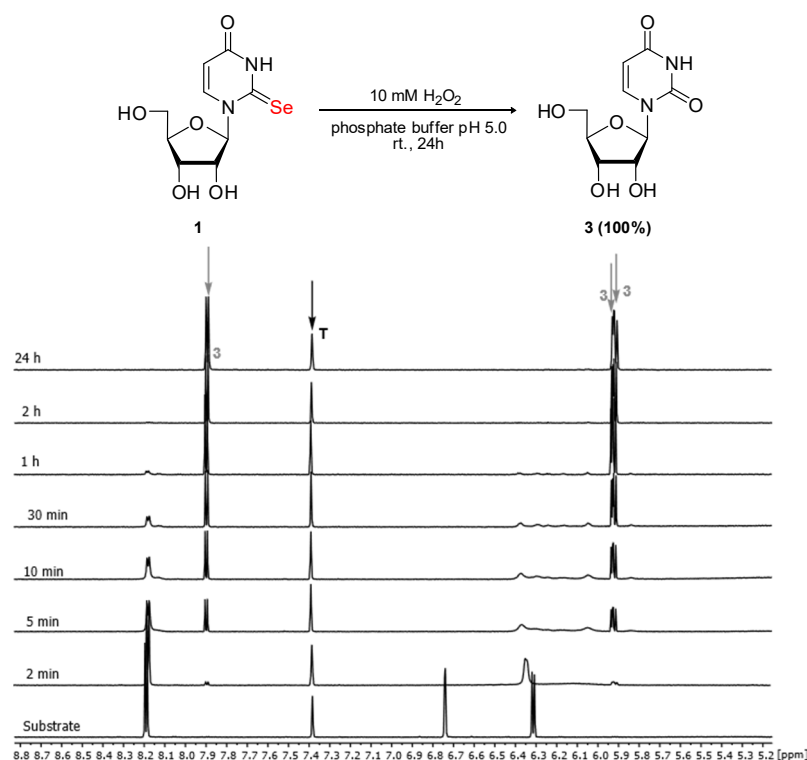

**Figure S32.** <sup>1</sup>H NMR analysis of the reaction mixtures for oxidation of Se2U (**1**, 10 mM) with H<sub>2</sub>O<sub>2</sub> (10 mM) in 67 mM phosphate buffer pH 5.0, at room temperature.

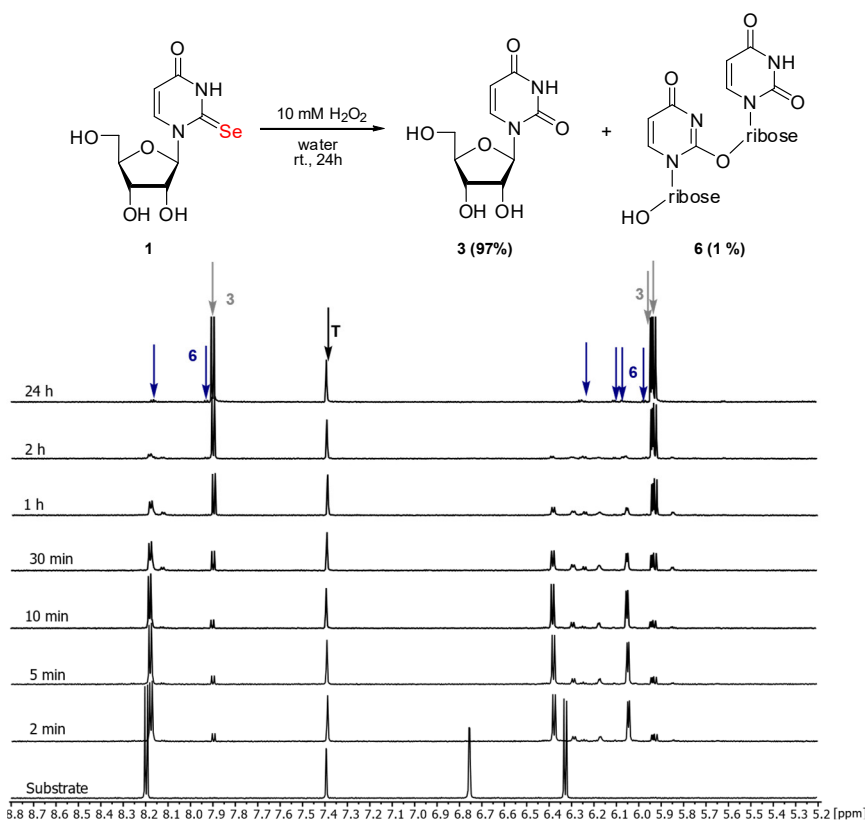

**FigureS33.** <sup>1</sup>H NMR analysis of the reaction mixtures for oxidation of Se2U (**1**, 10 mM) with H<sub>2</sub>O<sub>2</sub> (10 mM) in water, at room temperature.

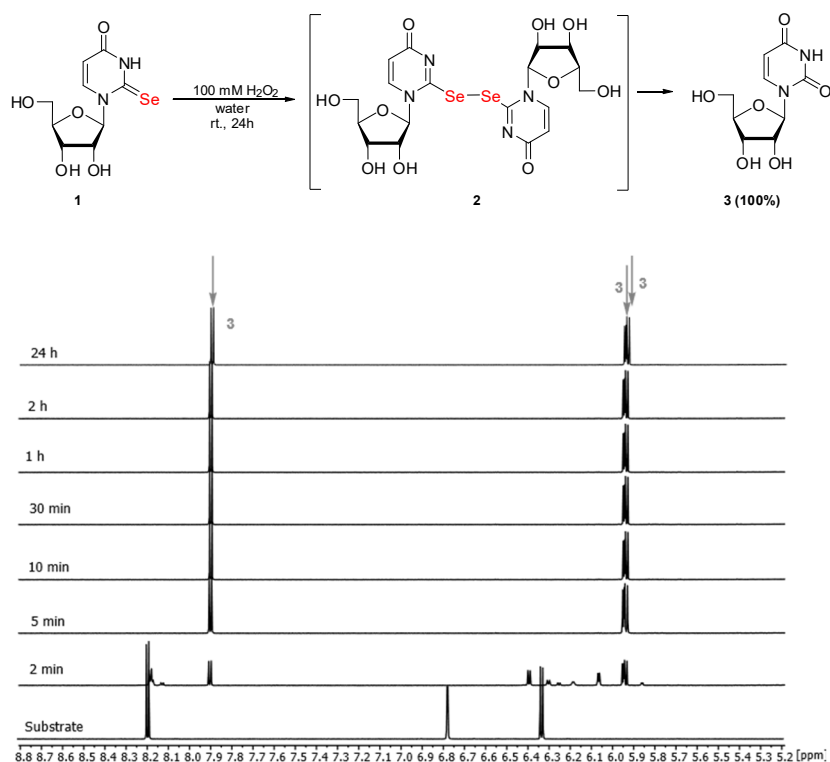

**Figure S34.** <sup>1</sup>H NMR analysis of the reaction mixtures for oxidation of Se2U (**1**, 10 mM) with H<sub>2</sub>O<sub>2</sub> (100 mM) in water, at room temperature.

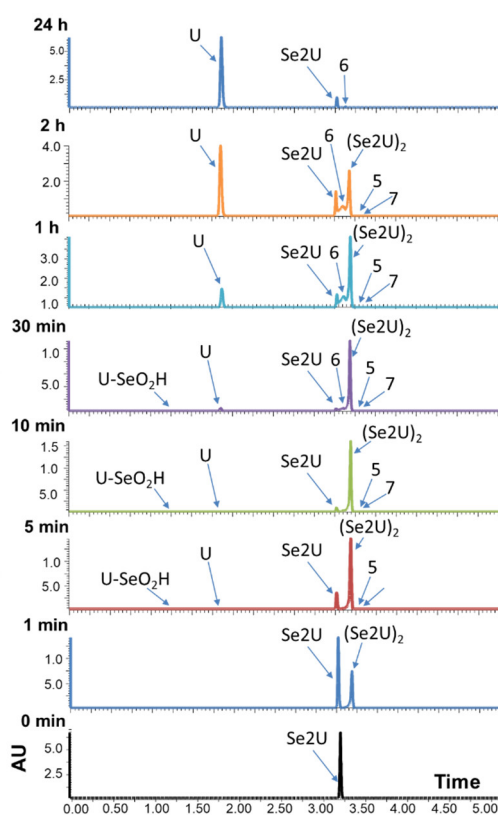

**Figure S35.** UPLC-PDA chromatographic analysis of the reaction mixtures for oxidation of Se2U (**1**, 10 mM) with H<sub>2</sub>O<sub>2</sub> (10 mM) in deionized water, at room temperature.

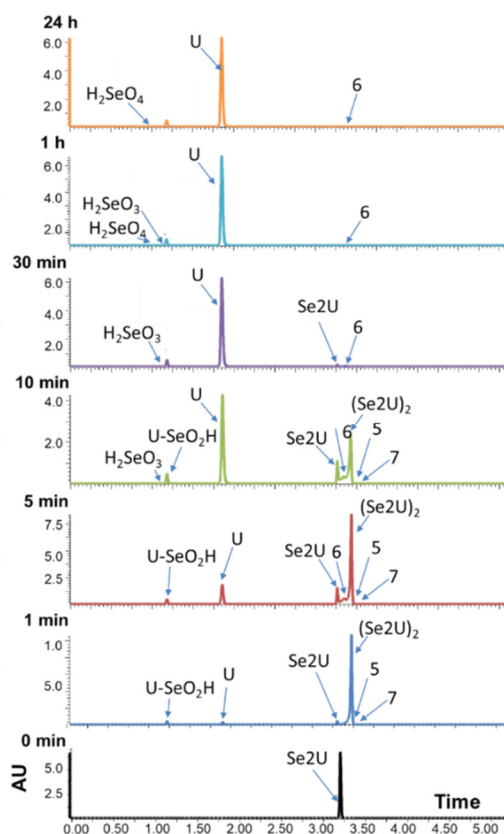

**Figure S36.** UPLC-PDA chromatographic analysis of the reaction mixtures for oxidation of Se2U (1, 10 mM) with H<sub>2</sub>O<sub>2</sub> (100 mM) in deionized water, at room temperature.

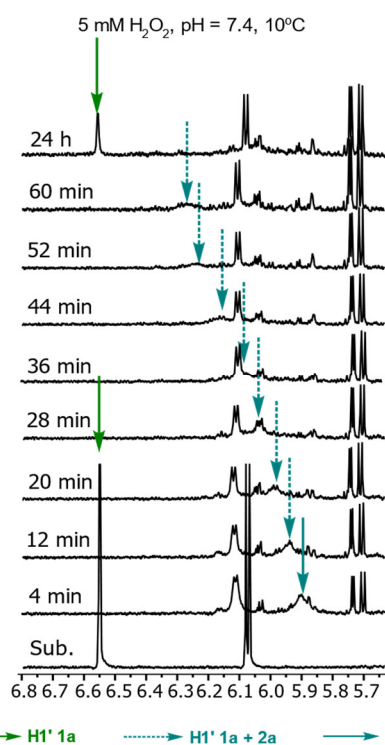

**Figure S37.** <sup>1</sup>H NMR analysis of the reaction mixtures for oxidation of Se2U (1, 10 mM) with H<sub>2</sub>O<sub>2</sub> (5 mM) in 67 mM phosphate buffer pH 7.4, at 10 °C.

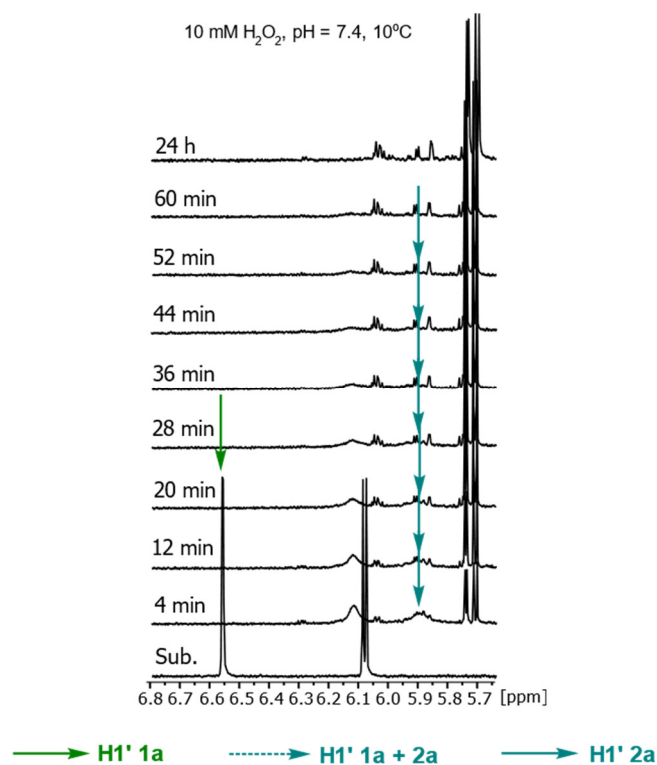

**Figure S38.**  $^1\text{H}$  NMR analysis of the reaction mixtures for oxidation of Se2U (**1**, 10 mM) with  $\text{H}_2\text{O}_2$  (10 mM) in 67 mM phosphate buffer pH 7.4, at 10 °C.

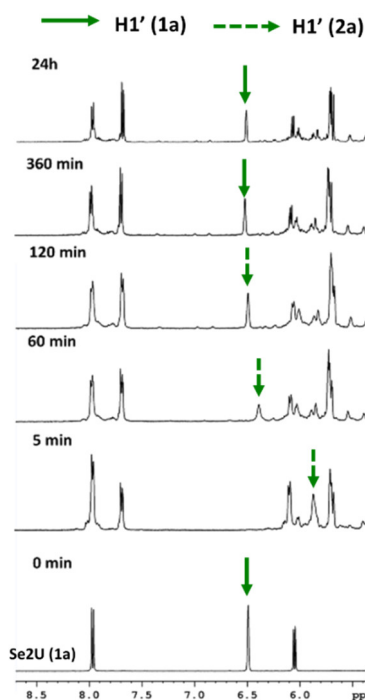

**Figure S39**  $^1\text{H}$  NMR analysis of the reaction mixtures for the oxidation of Se2U (**1**, 40 mM) with  $\text{H}_2\text{O}_2$  (20 mM) in phosphate buffer pH 7.4 at 10 °C.

## References

1. Leszczynska, G.; Cypryk, M.; Gostynski, B.; Sadowska, K.; Herman, P.; Bujacz, G.; Lodyga Chruscinska, E.; Sochacka, E.; Nawrot, B. *Int. J. Mol. Sci.* **2020**, *21*, 2882. <https://doi.org/10.3390/ijms21082882>.
